# Supplementary material for: Tuberculosis Pericarditis with Cardiac Tamponade: Management in the Resource-Limited Setting
Source: PubMed Central journal article supplement (PMC2990051; doi:10.4269/ajtmh.2010.10-0271), 2010-12-06
Supplement: SD6.pdf [file SD6.pdf]

SUPPLEMENTARY VIDEO 1. Video for the patient showing large pericardial effusion and right ventricular collapse characteristic of cardiac tamponade.

SUPPLEMENTARY VIDEO 2. Video for the patient post-pericardiocentesis showing improved right ventricular filling.
